# Supplementary material for: The Association between Exposure to Residential Indoor Volatile Organic Compounds and Measures of Central Arterial Stiffness in Healthy Middle-Aged Men and Women
Source: MDPI journal article supplement (doi:10.3390/ijerph19020981), 2022-01-16
Supplement: s1 [file s1]

## Supplementary material

**Table S1.** Estimated effect ( $\beta$ ) of an IQR increase in indoor VOC concentration on measures of arterial stiffness in a sex stratified population.

|                          | cAIx         |              |              | cAIx <sub>75</sub> |              |             | cPP         |             |             | cfPWV <sup>‡</sup> |
|--------------------------|--------------|--------------|--------------|--------------------|--------------|-------------|-------------|-------------|-------------|--------------------|
|                          | 24-hour      | Daytime      | Nighttime    | 24-hour            | Daytime      | Nighttime   | 24-hour     | Daytime     | Nighttime   |                    |
| <b>Men</b><br>(n = 39)   | 1.32         | 1.59         | 1.16         | 1.21               | 1.33         | 1.08        | -0.18       | -0.17       | -0.27       | -0.04              |
| 95% CI                   | 0.11, 2.54   | 0.28, 2.89   | -0.16, 2.48  | -0.15, 2.57        | -0.06, 2.71  | -0.43, 2.59 | -0.92, 0.56 | -0.90, 0.57 | -1.13, 0.59 | -0.36, 0.28        |
| p-value                  | <b>0.034</b> | <b>0.019</b> | <b>0.082</b> | <b>0.079</b>       | <b>0.060</b> | 0.155       | 0.622       | 0.645       | 0.525       | 0.805              |
| <b>Women</b><br>(n = 72) | 0.44         | 0.69         | 0.07         | 0.08               | 0.37         | -0.19       | 0.03        | 0.07        | -0.06       | 0.06               |
| 95% CI                   | -0.63, 1.51  | -0.56, 1.93  | -1.07, 1.22  | -0.96, 1.13        | -0.80, 1.53  | -1.42, 1.05 | -0.60, 0.65 | -0.56, 0.69 | -0.81, 0.68 | -0.06, 0.18        |
| p-value                  | 0.410        | 0.273        | 0.901        | 0.872              | 0.529        | 0.763       | 0.931       | 0.833       | 0.863       | 0.318              |

multiple linear regression; adjusted for age, gender, BMI, waist-hip ratio, socioeconomic status (low, medium, high) and 24-hour mean temperature; data are presented as mean change ( $\beta$ ) and 95% confidence interval for one IQR increase in indoor VOC (124.7 ppb); <sup>‡</sup>: measured in supine position during pulse wave analysis

**Table S2.** Estimated effect ( $\beta$ ) of an IQR increase in indoor VOC concentration on measures of arterial stiffness in an age stratified population.

|                      | cAIx        |             |             | cAIx <sub>75</sub> |             |             | cPP         |             |             | cfPWV <sup>†</sup> |
|----------------------|-------------|-------------|-------------|--------------------|-------------|-------------|-------------|-------------|-------------|--------------------|
|                      | 24-hour     | Daytime     | Nighttime   | 24-hour            | Daytime     | Nighttime   | 24-hour     | Daytime     | Nighttime   |                    |
| <b>≤ 50 years</b>    | 0.82        | 0.92        | 0.79        | 0.77               | 0.88        | 0.78        | -0.30       | -0.33       | -0.28       | -0.03              |
| 95% CI               | -0.33, 1.98 | -0.32, 2.16 | -0.40, 1.97 | -0.38, 1.91        | -0.33, 2.09 | -0.46, 2.02 | -0.76, 0.17 | -0.80, 0.15 | -0.85, 0.28 | -0.18, 0.12        |
| <i>p</i> -value      | 0.156       | 0.140       | 0.186       | 0.183              | 0.149       | 0.211       | 0.200       | 0.177       | 0.315       | 0.683              |
| <b>&gt; 50 years</b> | 0.65        | 1.16        | 0.25        | 0.31               | 0.55        | -0.10       | 0.00        | 0.12        | -0.26       | 0.02               |
| 95% CI               | -0.87, 2.17 | -0.69, 3.00 | -1.41, 1.90 | -1.18, 1.80        | -1.09, 2.19 | -1.94, 1.73 | -1.19, 1.19 | -1.09, 1.34 | -1.55, 1.03 | -0.22, 0.26        |
| <i>p</i> -value      | 0.394       | 0.214       | 0.767       | 0.682              | 0.502       | 0.910       | 0.995       | 0.838       | 0.684       | 0.860              |

multiple linear regression; adjusted for age, gender, BMI, waist-hip ratio, socioeconomic status (low, medium, high) and 24-hour mean temperature data are presented as mean change ( $\beta$ ) and 95% confidence interval for one IQR increase in indoor VOC (124.7 ppb); <sup>†</sup>: measured in supine position during pulse wave analysis
